# Supplementary material
Source: publisher site journal article supplement (https://www.dovepress.com/article/303101)
Supplement: Supplementary file 1 [file get_supplementary_file.php]

***Appendix 1.***

Data extraction Form:

1. General information

| Title of the article |  |
| --- | --- |
| First author and Date published |  |
| Country of study, and country classification |  |
| Conflict of interest |  |
| Notes: | |

1. Eligibility

| Type of the study |  |
| --- | --- |
| Population |  |
| Primary and secondary outcomes measure |  |
| Decision |  |
| Notes: | |

1. If included;

| Quality assessment score |  |
| --- | --- |
| Aim of the study |  |
| Population and location description |  |
| Design |  |
| Study period |  |
| Total number of participants |  |
| Location of the study, secondary or tertiary hospital |  |
| Results:  PIM detected  Tool used  HCP involved  Reduction in PIM  Common PIM  Other results |  |
| Authors Conclusion |  |
| Strength of the study |  |
| Limitation of the study |  |
| Notes: | |
